# Supplementary material for: Facile One-Pot Multicomponent Synthesis of Pyrazolo-Thiazole Substituted Pyridines with Potential Anti-Proliferative Activity: Synthesis, In Vitro and In Silico Studies
Source: MDPI journal article supplement (doi:10.3390/molecules26113103), 2021-05-22
Supplement: s1 [file s1]

## Supplementary Data

### **Facile one-pot multicomponent synthesis of pyrazolo-thiazole substituted pyridines with potential anti-proliferative activity: Synthesis, *in vitro* and *in silico* studies**

Islam H. El Azab<sup>1\*</sup>, Rania B. Bakr<sup>2</sup>, and Nadia A.A. Elkanzi<sup>3,4</sup>

<sup>1</sup> Food Science and Nutrition Department, College of Science, Taif University, P.O. box 11099, Taif 21944, Saudi Arabia.

<sup>2</sup>Department of Pharmaceutical Organic Chemistry, Faculty of Pharmacy, Beni-Suef University, Beni-Suef, Egypt

<sup>3</sup> Chemistry Department, College of Science, Jouf University, P.O. Box 2014, Sakaka, Saudi Arabia.

<sup>4</sup>Chemistry Department, Faculty of Science, Aswan University, Aswan, P.O. box 81528, Aswan, Egypt.

\*Correspondence: [i.helmy@tu.edu.sa](mailto:i.helmy@tu.edu.sa) (I.H.E.)

Received: date; Accepted: date; Published: date

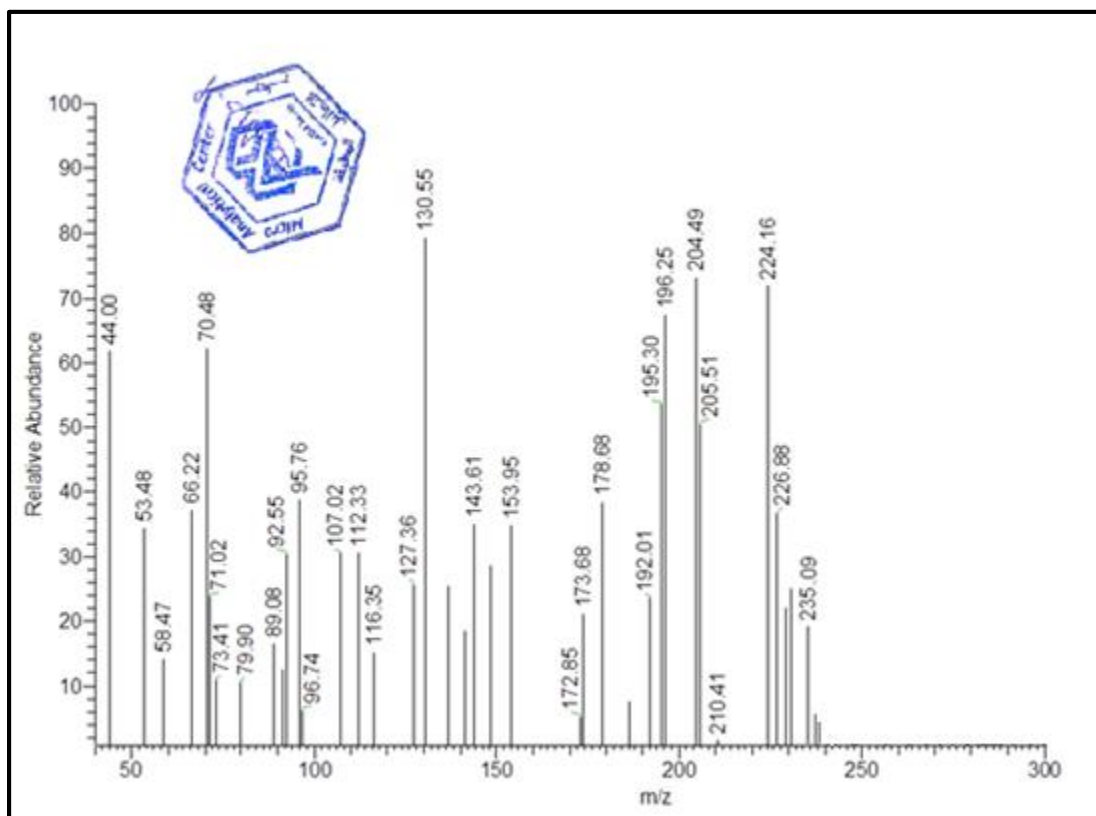

Mass of compound 2

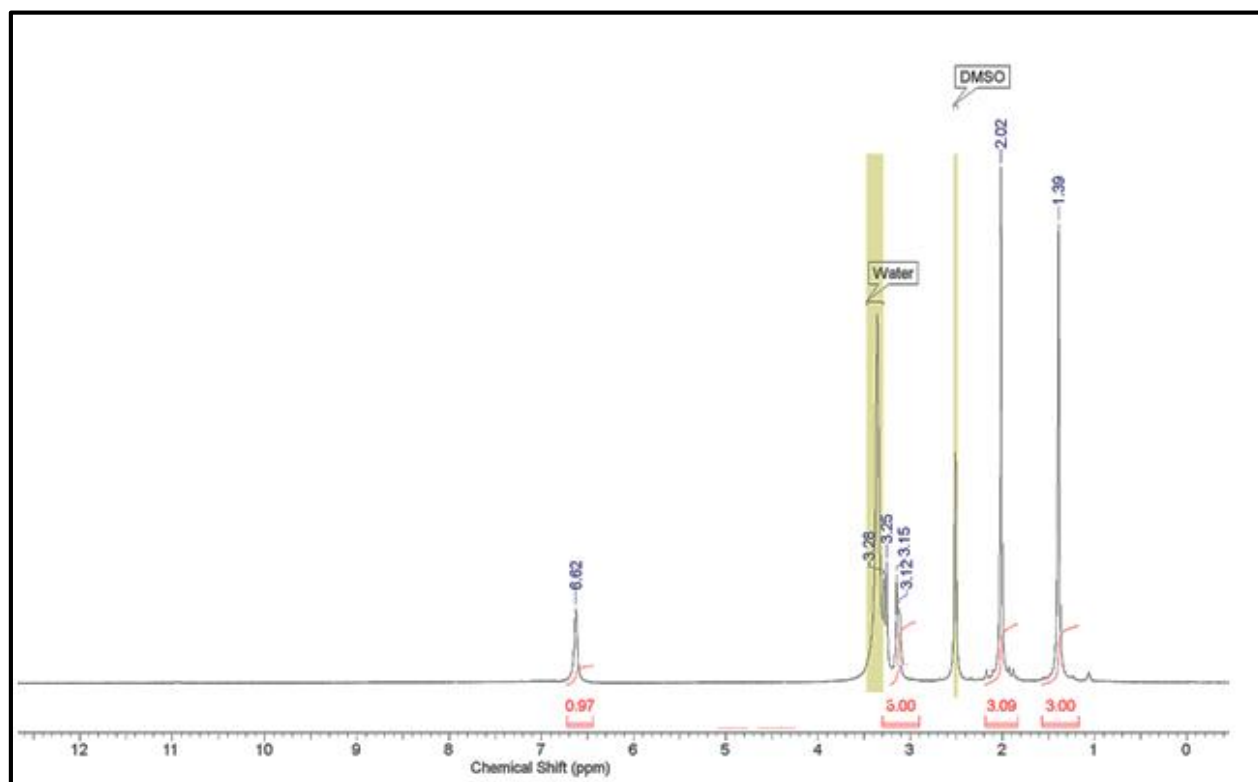

$^1\text{H}$  NMR of compound 2

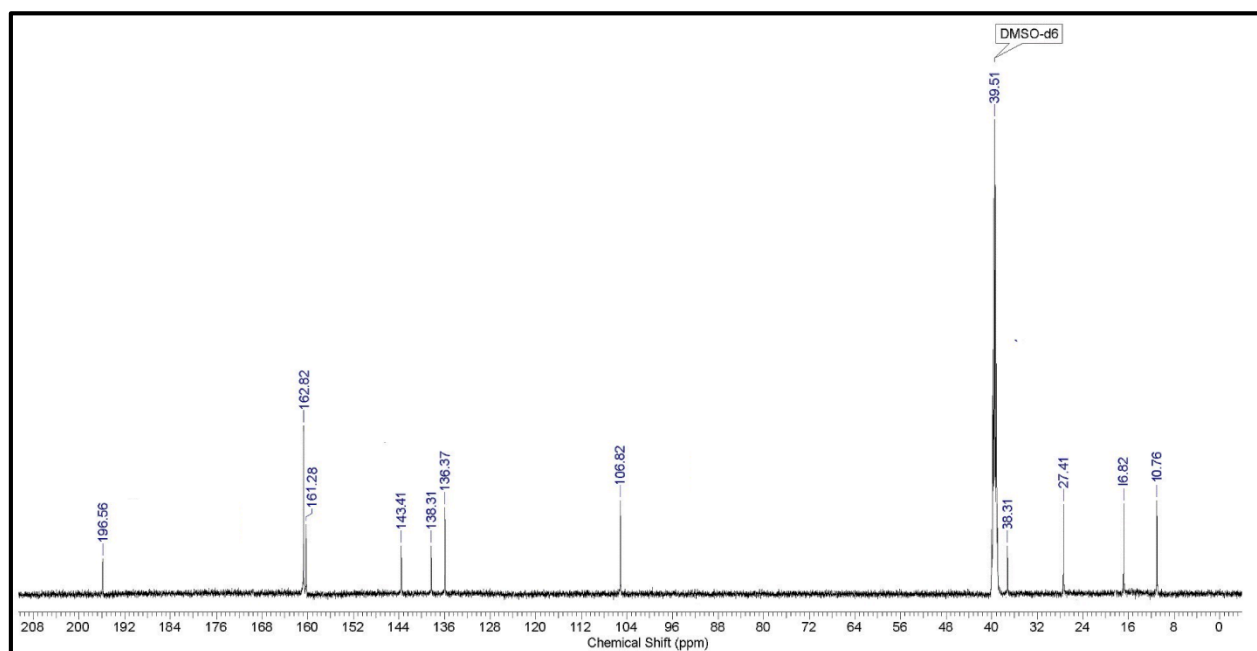

<sup>13</sup>C NMR of compound 2

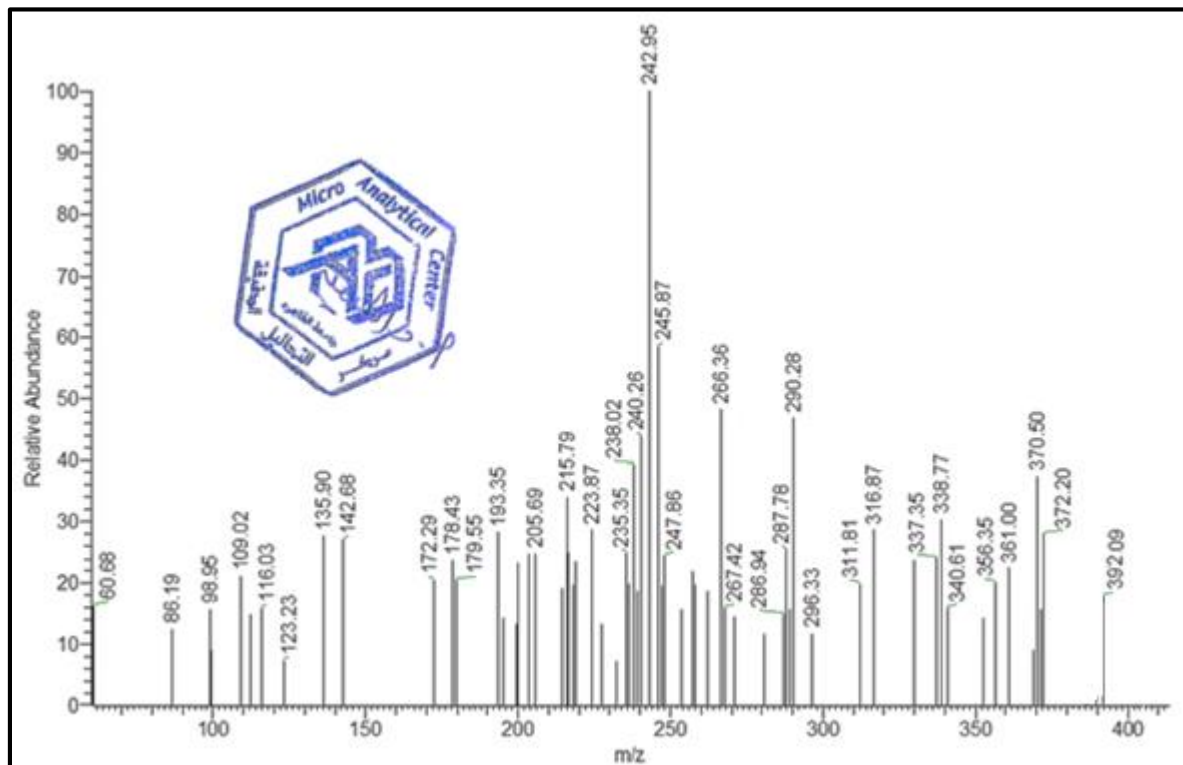

Mass of compound 4

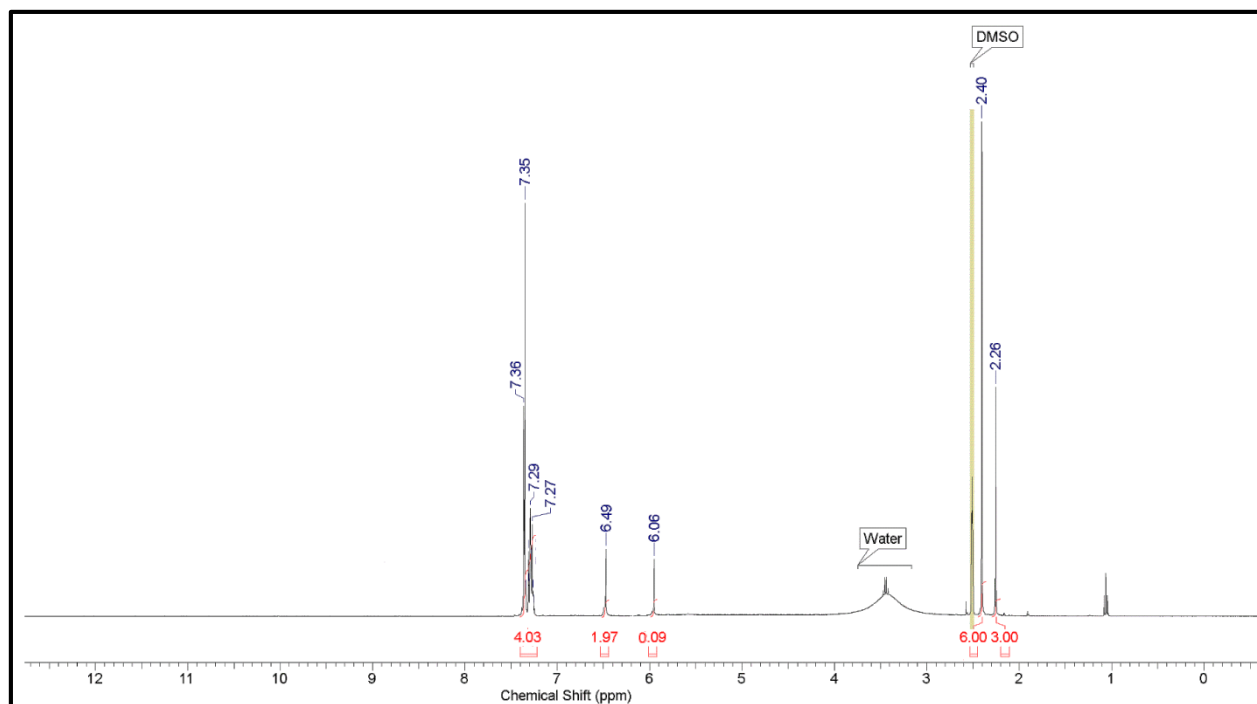

<sup>1</sup>H NMR of compound 4

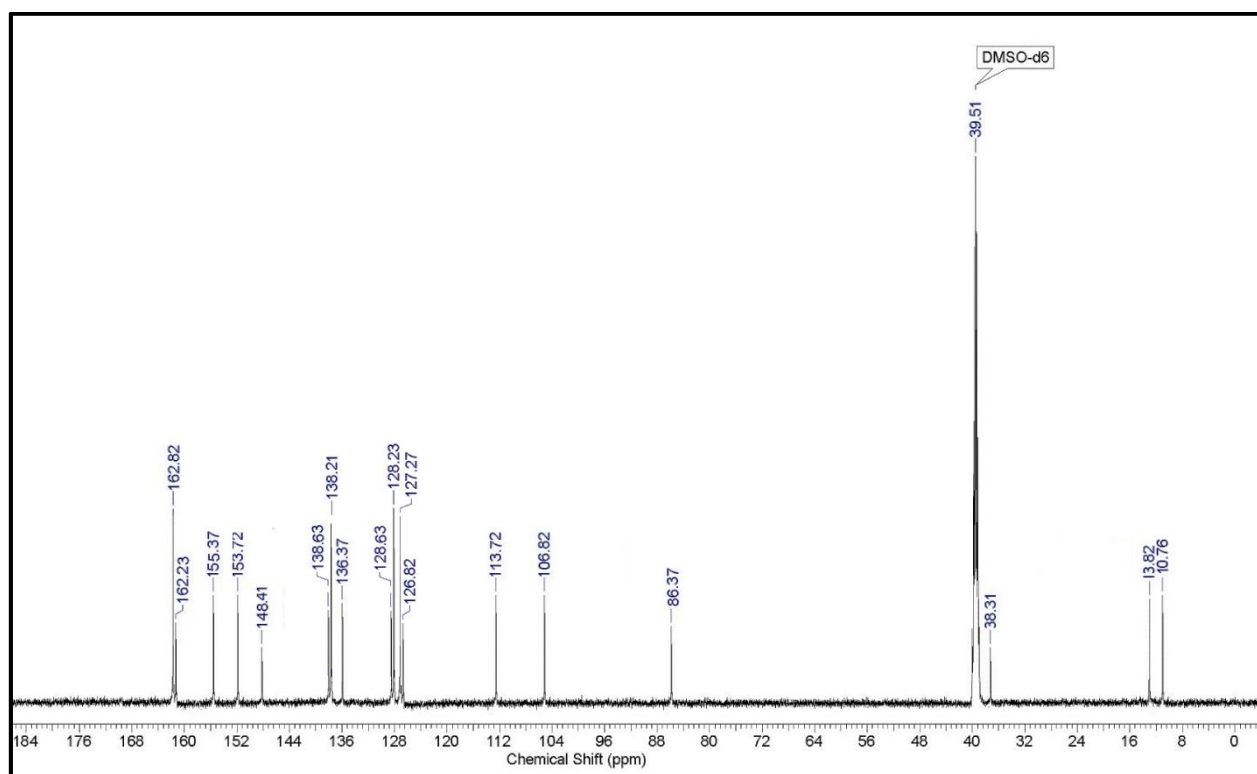

<sup>13</sup>C NMR of compound 4

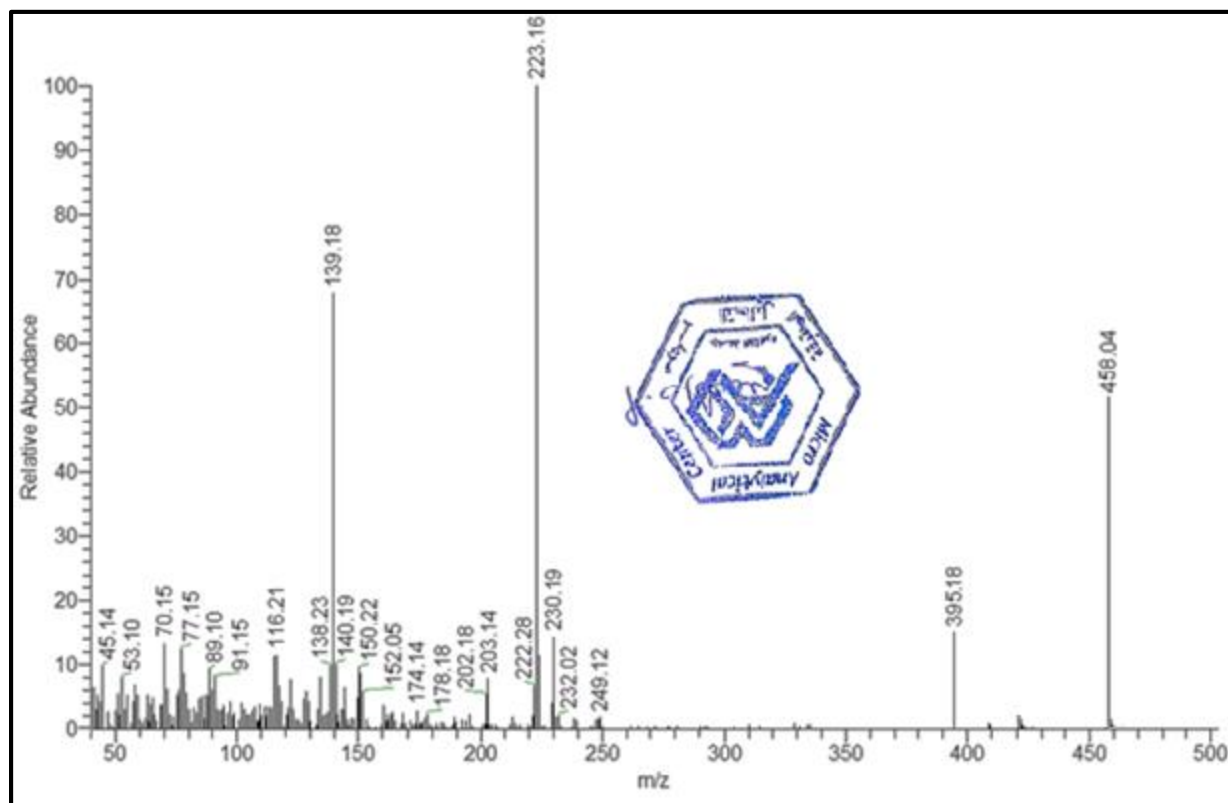

Mass of compound 6

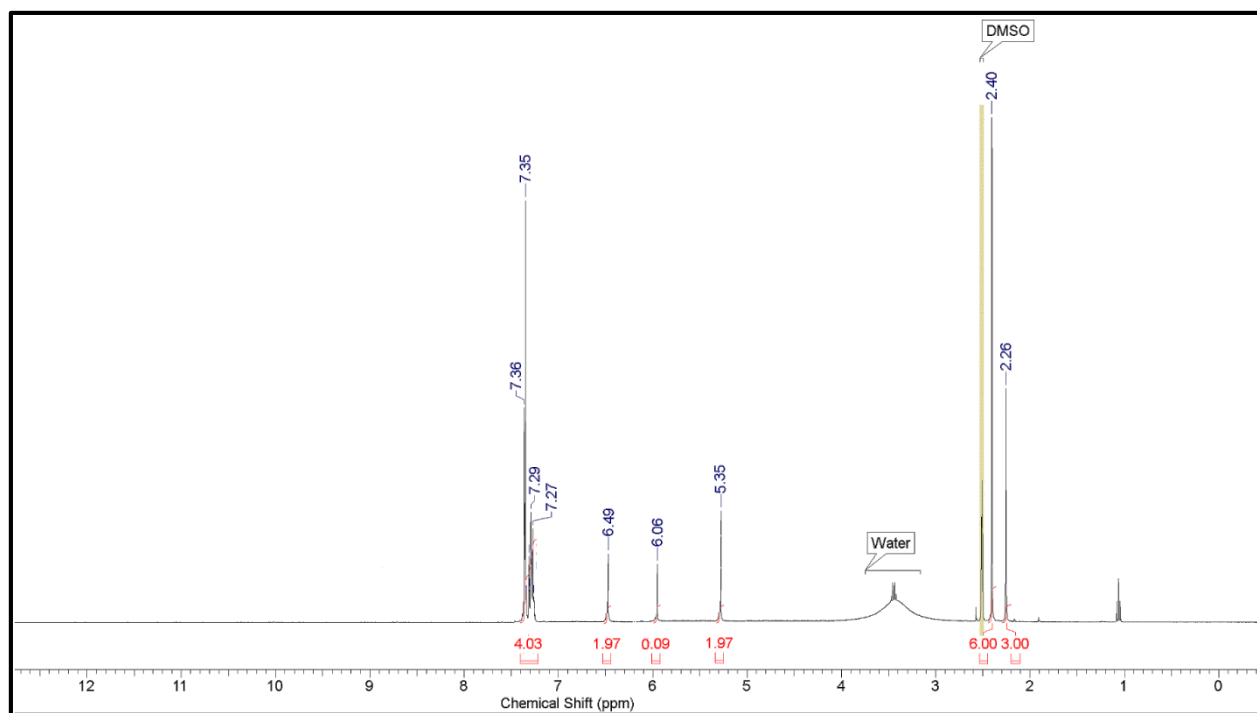

<sup>1</sup>H NMR of compound 6

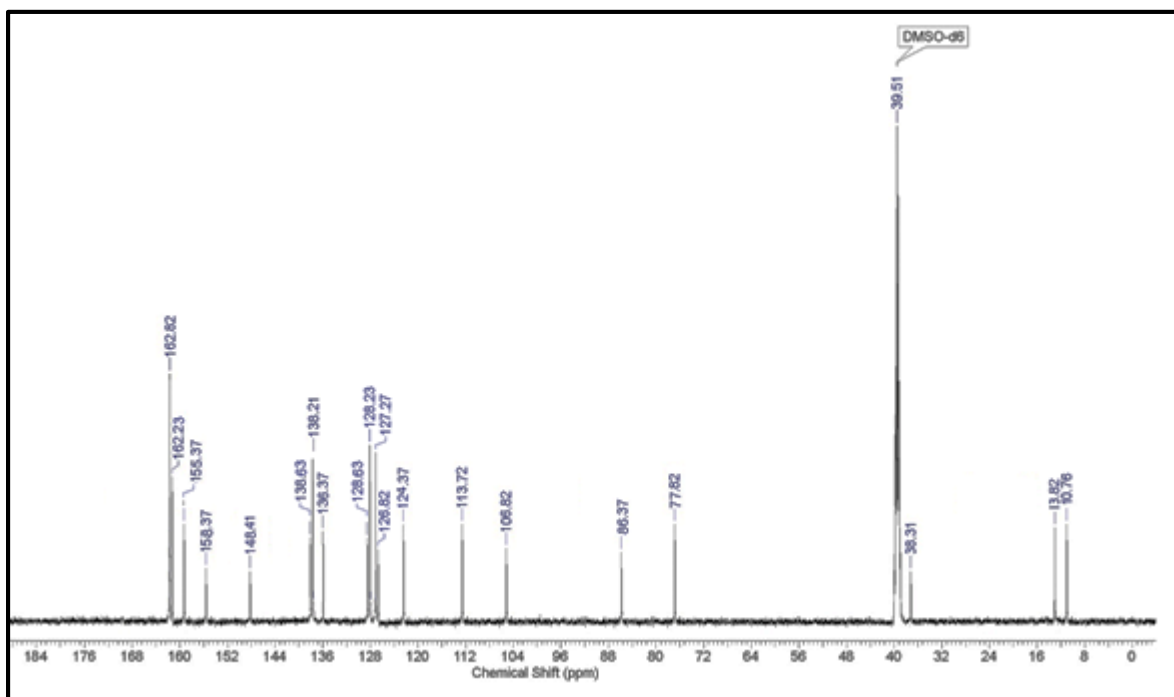

<sup>13</sup>C NMR of compound 6

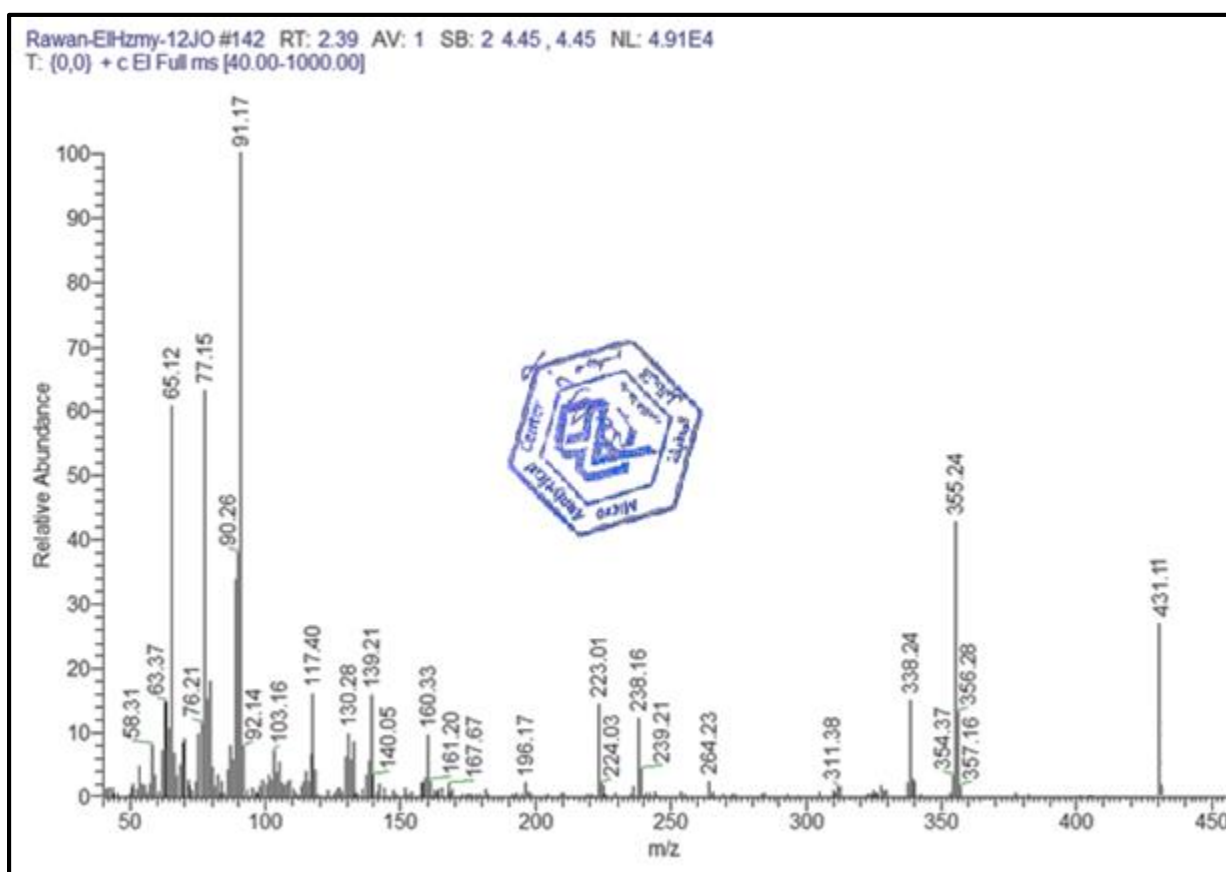

Mass of compound 9

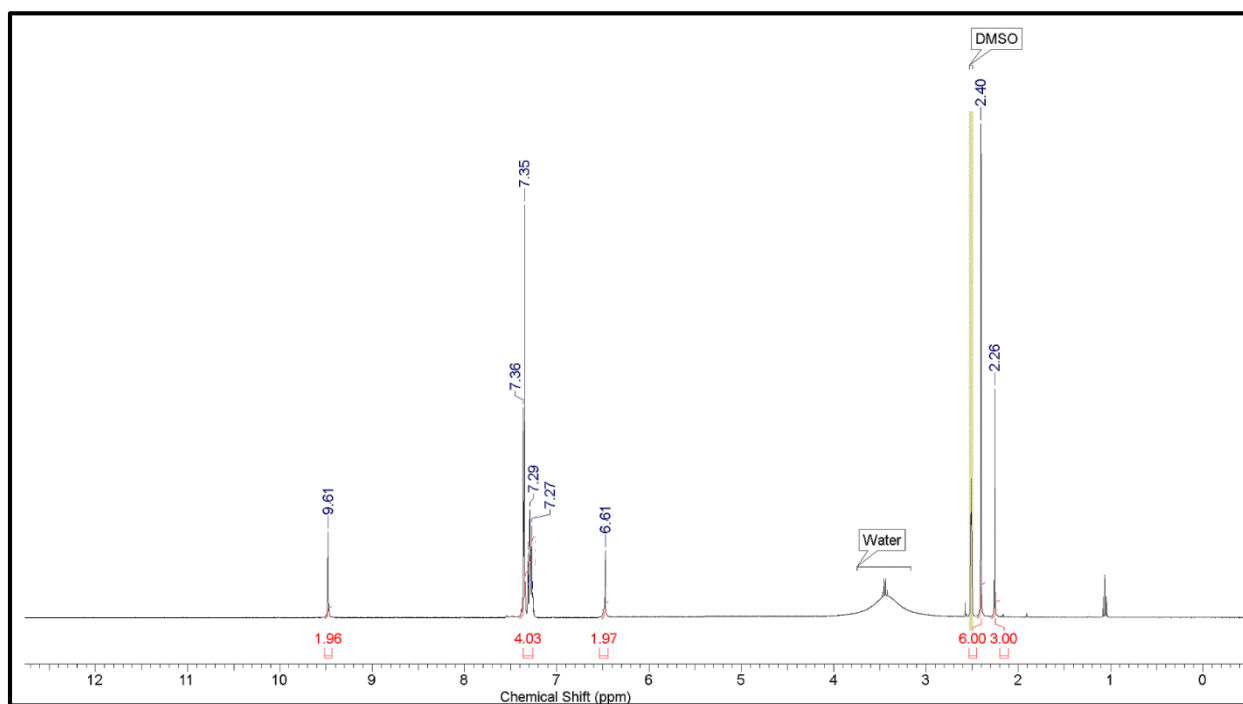

<sup>1</sup>H NMR of compound 9

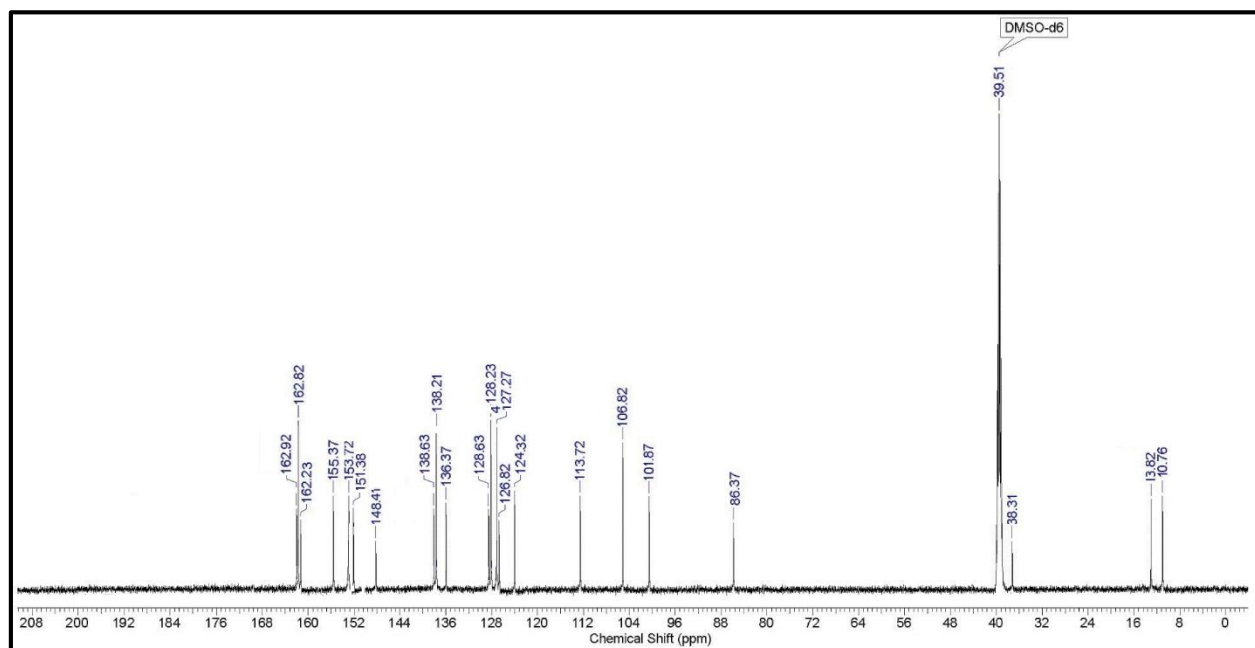

<sup>13</sup>C NMR of compound 9

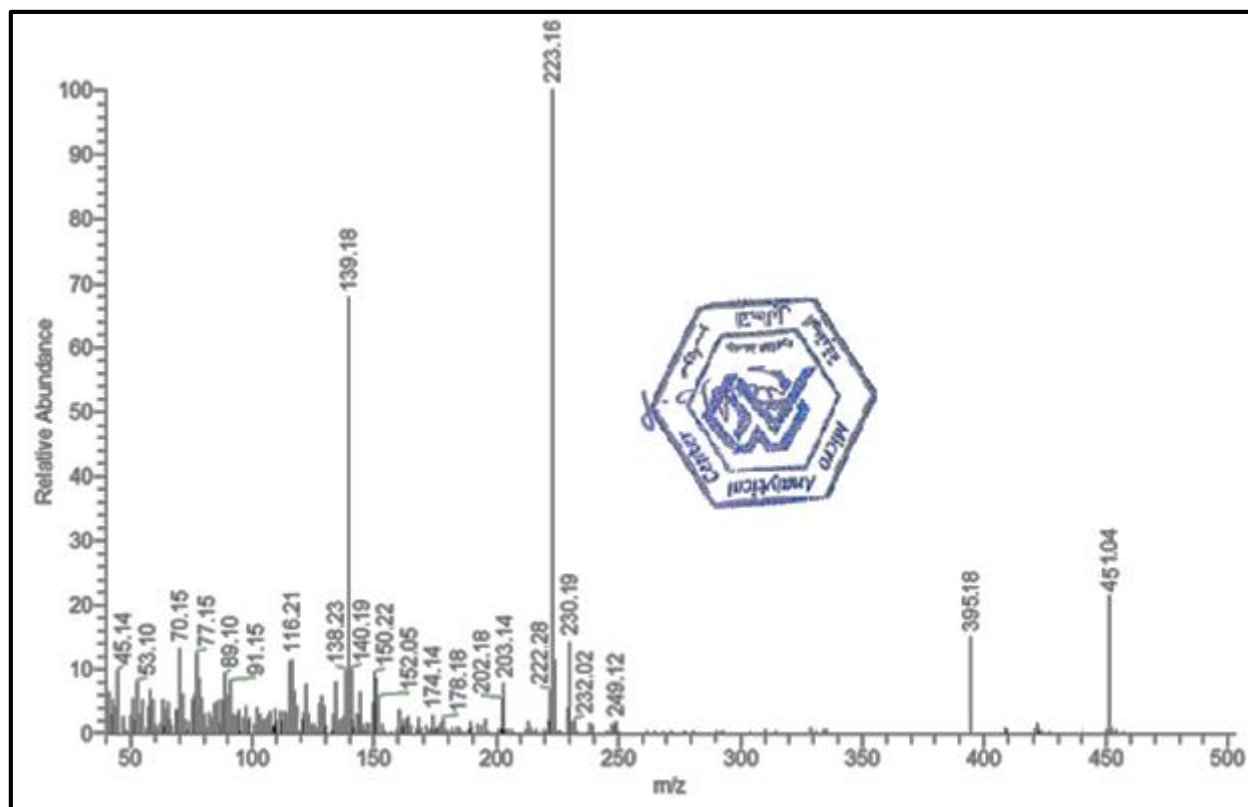

Mass of compound 13

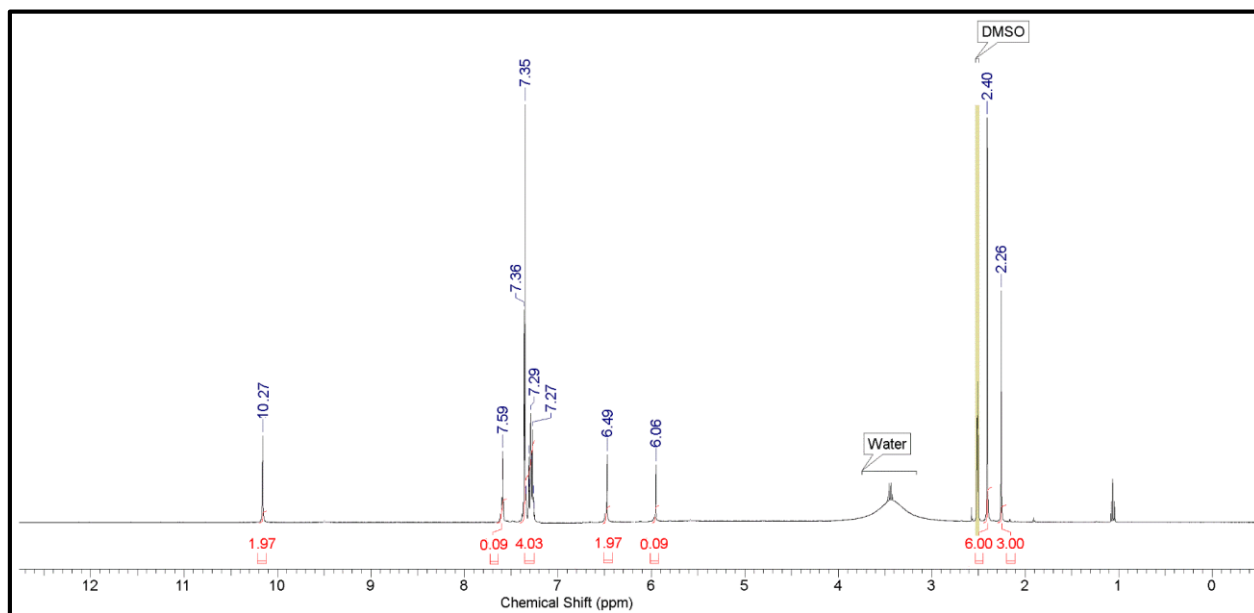

$^1\text{H}$  NMR of compound 13



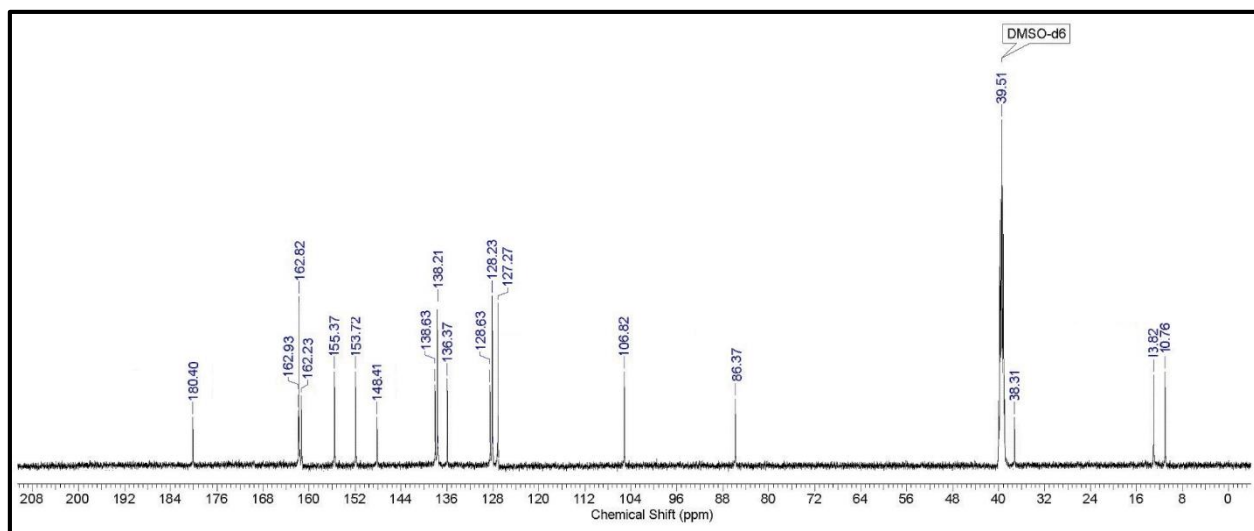

<sup>13</sup>C NMR of compound 13

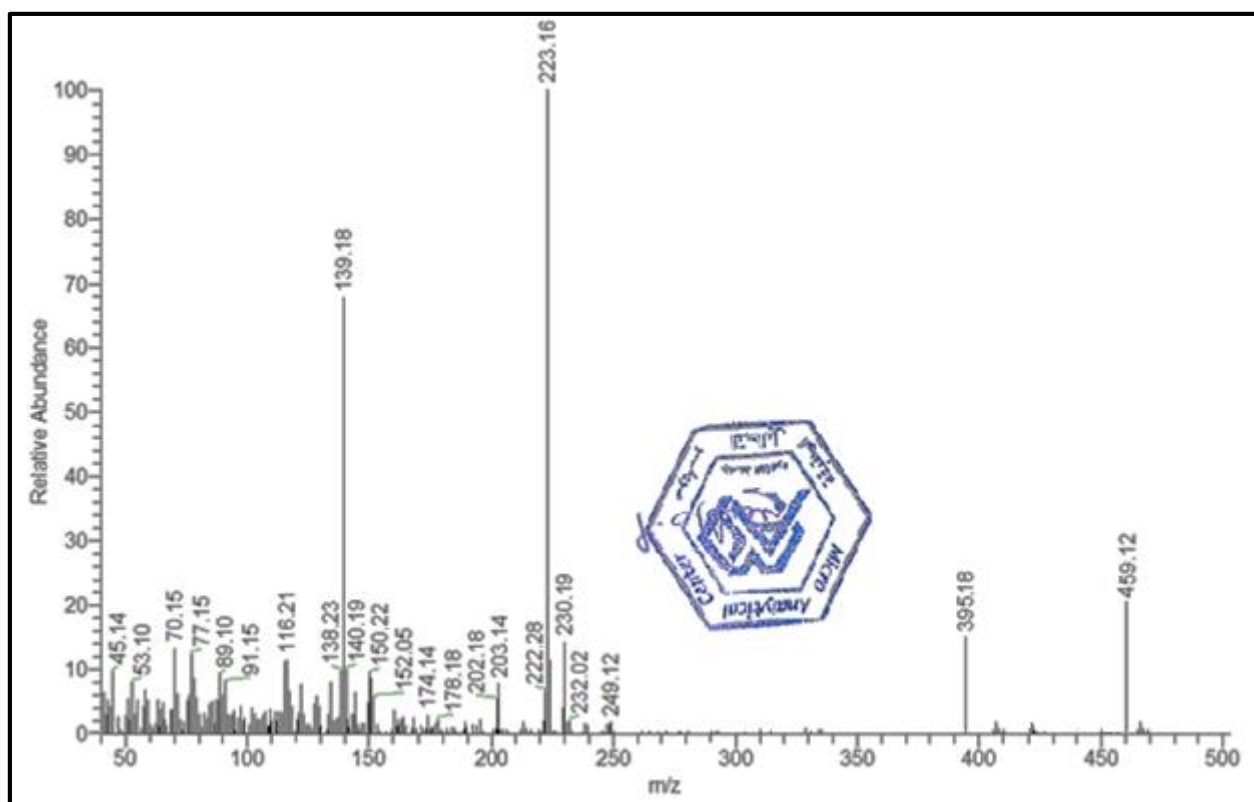

Mass of compound 16

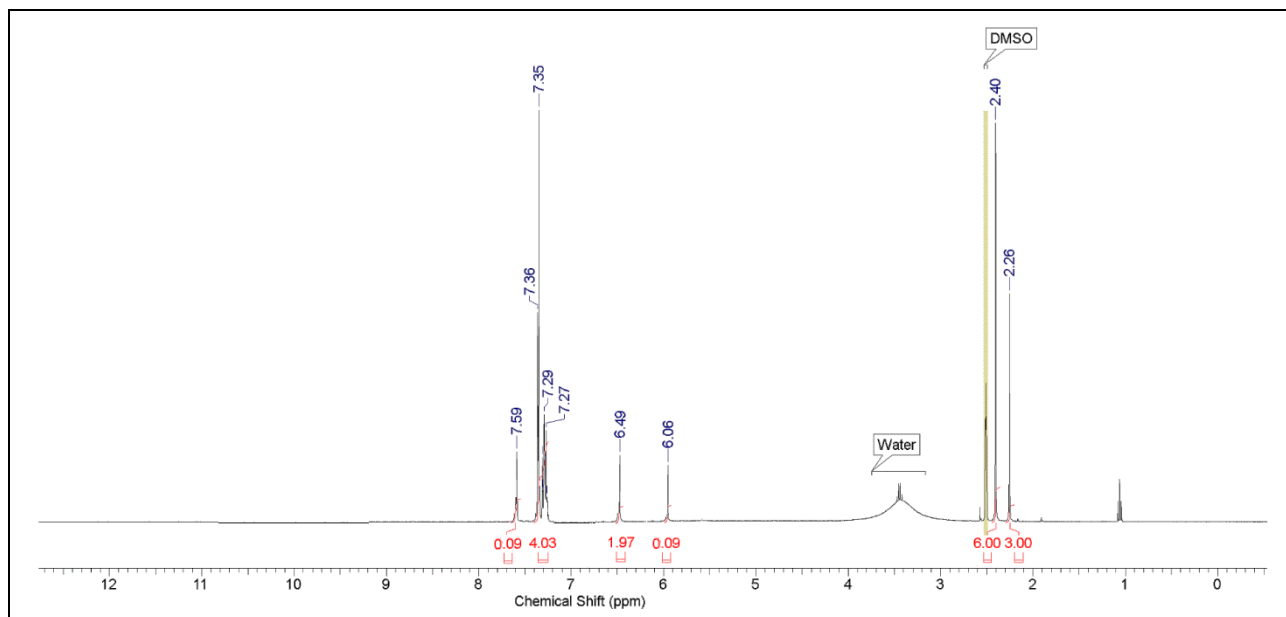

<sup>1</sup>H NMR of compound 16

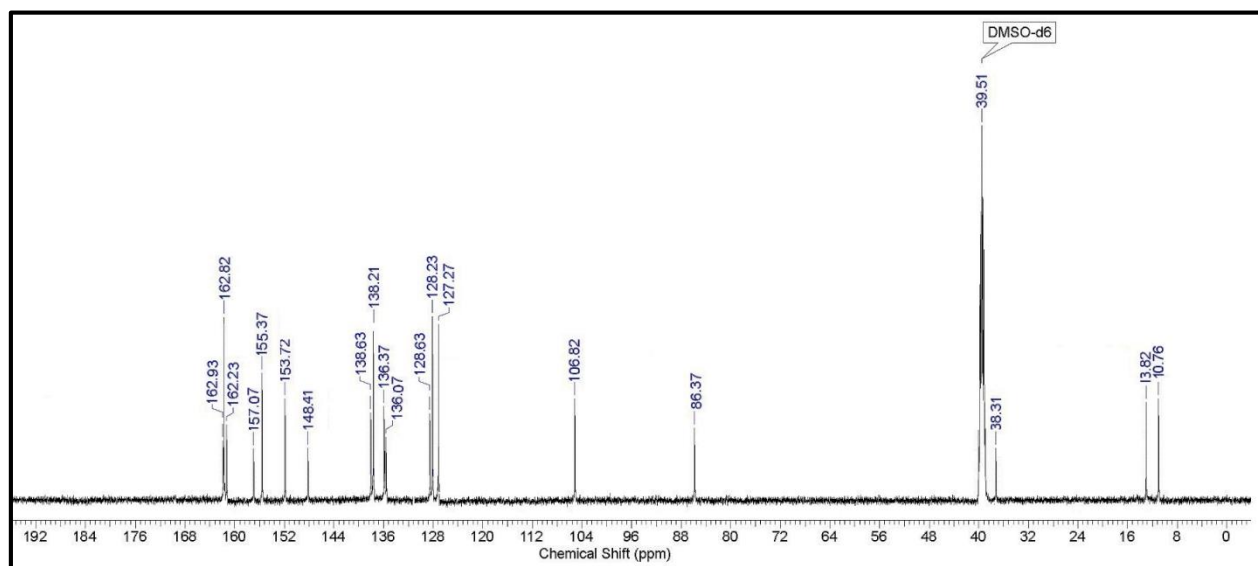

<sup>13</sup>C NMR of compound 16
